# Supplementary material for: Single step synthesis of metallic nanoparticles using dihydroxyl functionalized ionic liquids as reductive agent
Source: Royal Society of Chemistry journal article supplement (doi:10.1039/c3ra43909g), 2013-01-01
Supplement: c3ra43909g.pdf [file c3ra43909g.pdf]

## Single step synthesis of metallic nanoparticles using dihydroxyl functionalized ionic liquids as reductive agent

Walid Darwich,<sup>a</sup> Christian Gedig,<sup>b</sup> Hassan Srour,<sup>a</sup> Catherine C. Santini<sup>a\*</sup> Martin H. G. Prechtl,<sup>b\*</sup>

Received (in XXX, XXX) 25th July 2013, Accepted 19th August 2013

DOI: 10.1039/b000000x

S

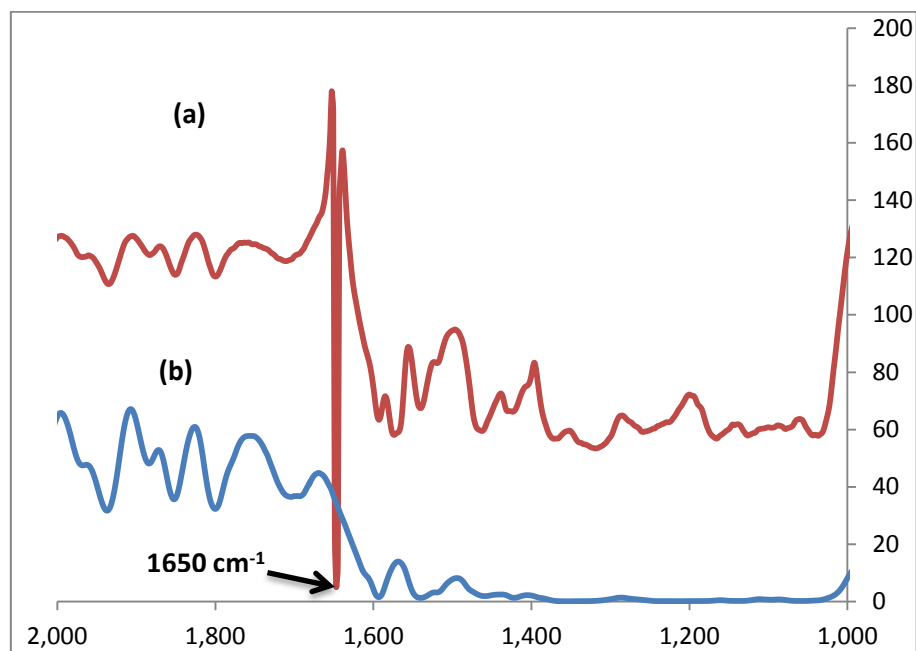

**Figure S1:** FT-IR spectra of suspension of CuNPs in C1C1(EG)ImNTf2 (a) and pure C1C1(EG)ImNTf2 (b).

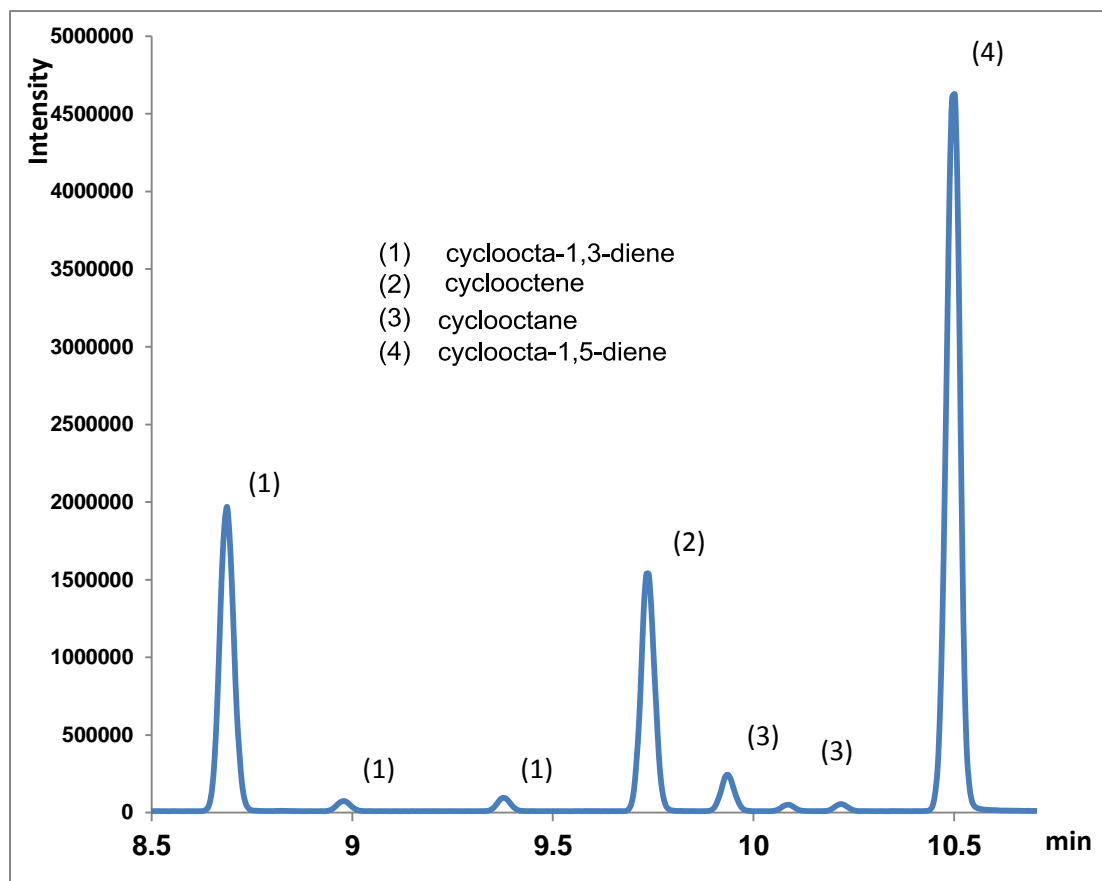

**Figure S2** ; Gas Chromatogram of the Ni NPs suspension in  $C_1C_1(EG)ImNTf_2$

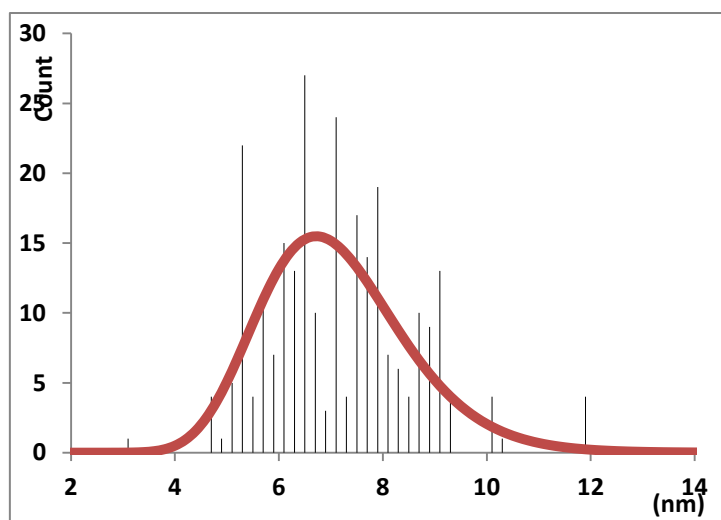

**Figure S3:** TEM images and particle size distribution of the synthesized ruthenium nanoparticles.

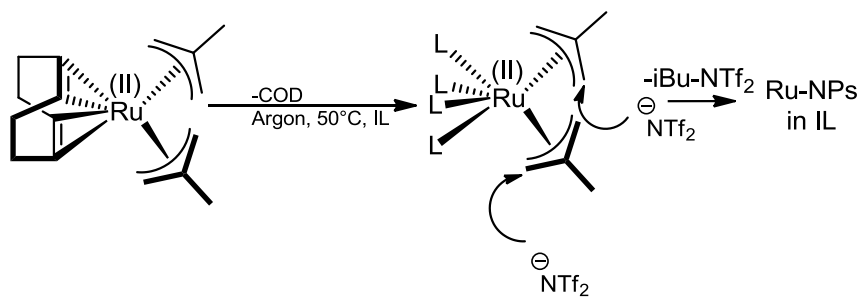

**Scheme S1:** Proposed mechanism of the formation RuNPs in imidazolium NTf<sub>2</sub> ILs as reported.<sup>1</sup>

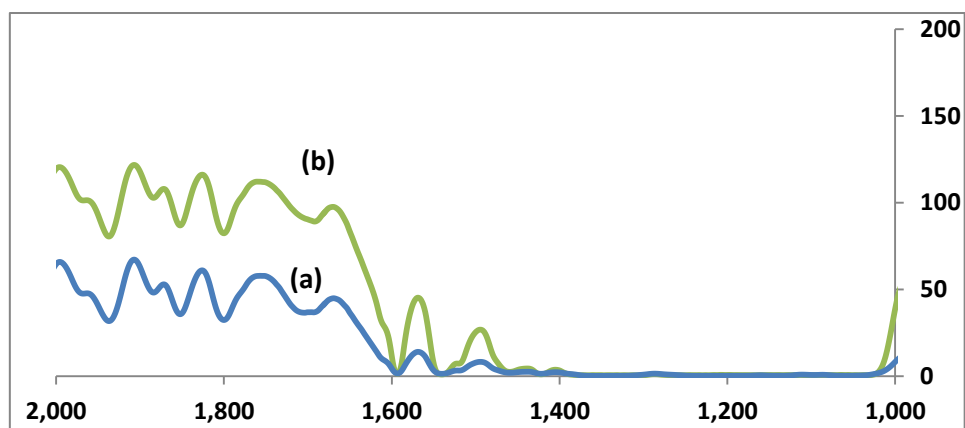

**Figure S4:** FT-IR spectra of suspension of RuNPs in C1C1(EG)ImNTf2 (a) and pure C1C1(EG)ImNTf2 (b).

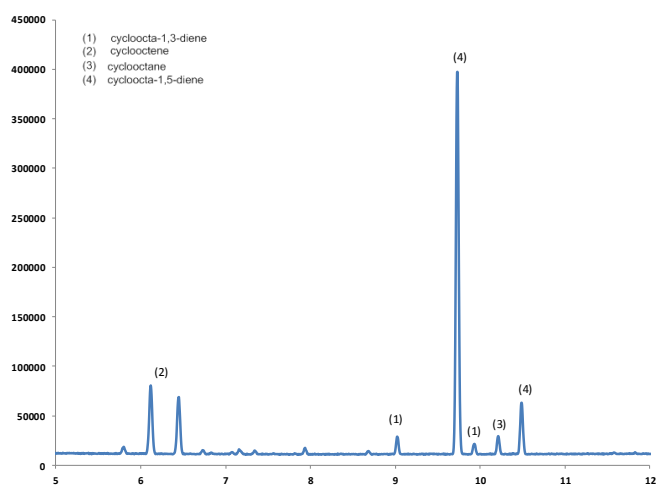

**Figure S5** Gas chromatogram of the suspension of RuNPs in  $C_1C_1(EG)ImNTf_2$

1. M. H. G. Prechtl, P. S. Campbell, J. D. Scholten, G. B. Fraser, G. Machado, C. C. Santini, J. Dupont and Y. Chauvin, *Nanoscale*, 2010, **2**, 2601-2606.
